# Supplementary material
Source: PubMed Central journal article supplement (PMC2330287)
Supplement: plntphys_pp.108.117820_2.pdf [file plntphys_pp.108.117820_2.pdf]

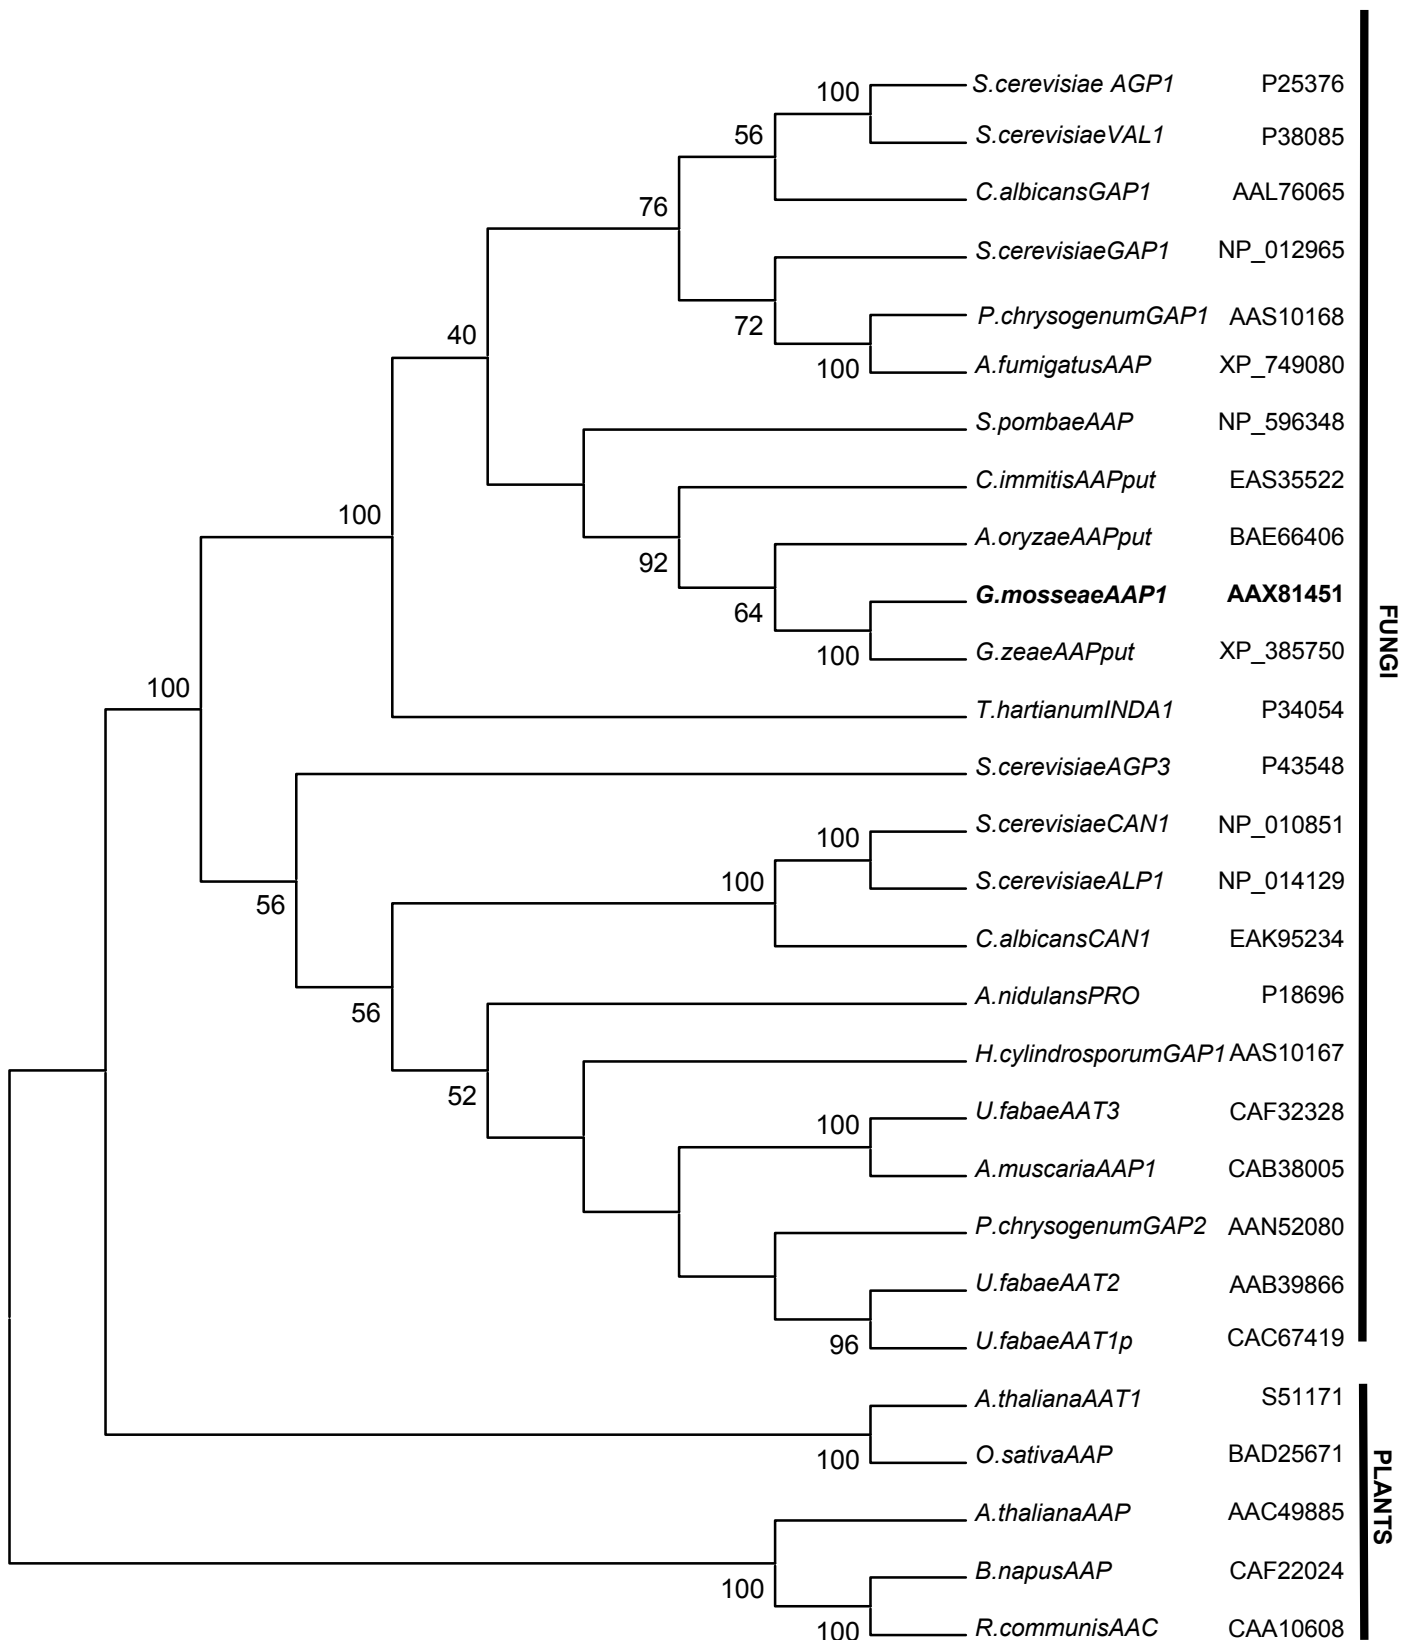

### Supplemental data S2.

The unrooted phylogram obtained using the Neighbour-Joining algorithm and the version 3.1 of the MEGA programme.
